# Supplementary material for: Incremental improvements of 2030 targets insufficient to achieve theParis Agreement goals
Source: Copernicus journal article supplement (doi:10.5194/esd-2019-54), 2019-09-20
Supplement: Supplementary file 1 [file esd-2019-54-supplement.pdf]

# Supplementary Material - Incremental improvements to 2030 targets insufficient to achieve the Paris Agreement goals

Geiges Andreas<sup>1</sup>, Paola Yanguas Parra<sup>1</sup>, Marina Andrijevic<sup>1,2</sup>, William Hare<sup>1</sup>, Alexander Nauels<sup>1</sup>, Peter Pfleiderer<sup>1,2,3</sup>, Michiel Schaeffer<sup>1,4</sup>, and Carl-Friedrich Schleussner<sup>1,2,3</sup>

<sup>1</sup>Climate Analytics, 10961 Berlin, Germany

<sup>2</sup>IRITHESys, Humboldt University, 10117 Berlin, Germany

<sup>3</sup>Potsdam Institute for Climate Impact Research, 14473 Potsdam, Germany

<sup>4</sup>Department of Environmental Sciences, Wageningen University and Research Centre, 6700 AA Wageningen, The Netherlands

**Correspondence:** Andreas Geiges (andreas.geiges@climateanalytics.org)

*Copyright statement.* TEXT

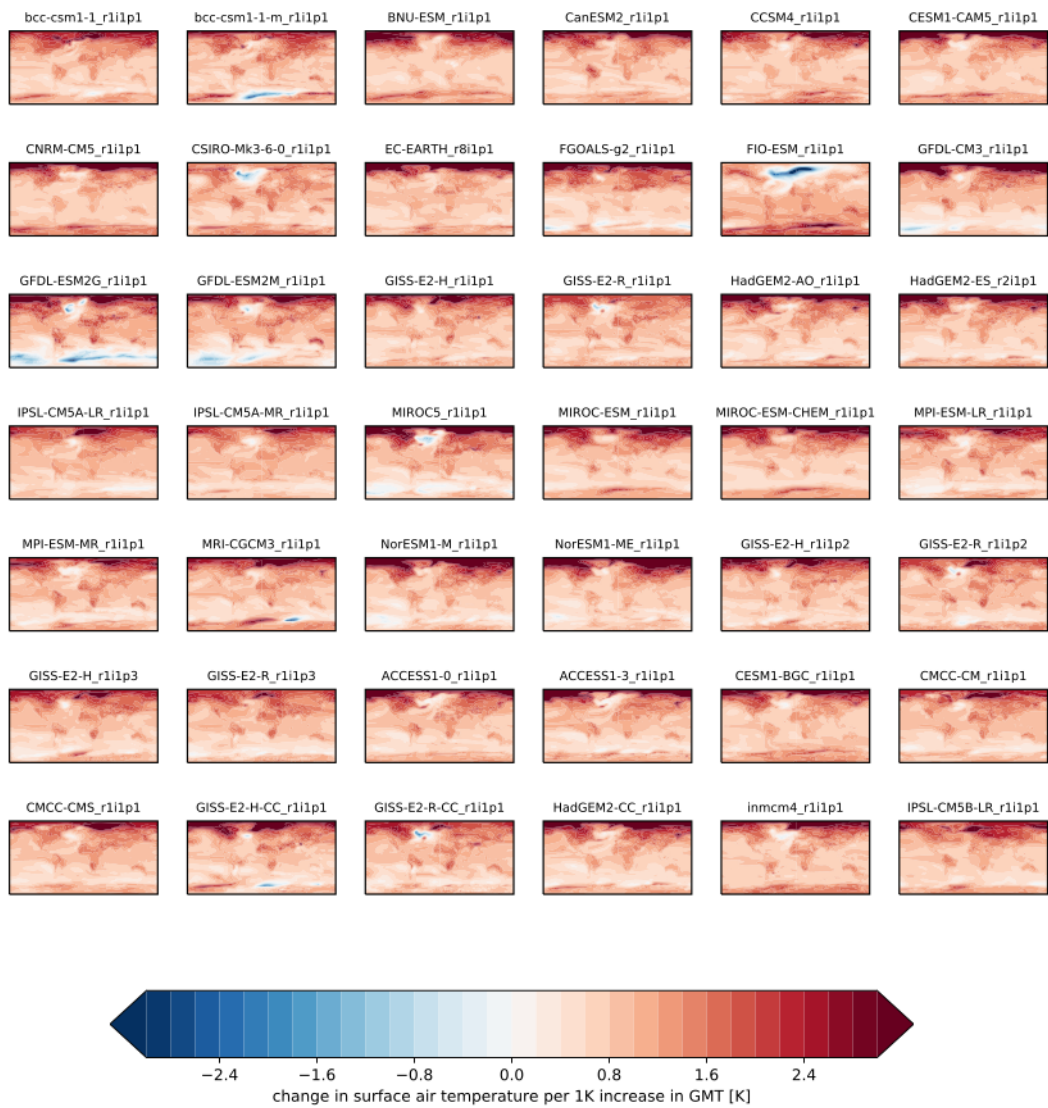

**Figure A1.** Downscaling factors for all used global circulation models. In each panel, the surface air temperature response to an increase of 1K in GMT is displayed (in K).

| Model          | Run    | NDC reference |      | CAT -33% |      | ALL -33% |      | 1.5°C |      |
|----------------|--------|---------------|------|----------|------|----------|------|-------|------|
|                |        | RCP           | Year | RCP      | Year | RCP      | Year | RCP   | Year |
| ACCESS1-0      | rli1p1 | rcp85         | 2052 | rcp85    | 2038 | rcp85    | 2035 | rcp85 | 2023 |
| ACCESS1-3      | rli1p1 | rcp85         | 2050 | rcp85    | 2037 | rcp85    | 2035 | rcp85 | 2022 |
| CANESM2        | r5i1p1 | rcp45         | 2062 | rcp45    | 2037 | rcp45    | 2034 | rcp45 | 2020 |
| CCSM4          | r2i1p1 | rcp85         | 2060 | rcp45    | 2061 | rcp45    | 2053 | rcp45 | 2031 |
| CESM1-BGC      | rli1p1 | rcp85         | 2058 | rcp45    | 2056 | rcp45    | 2051 | rcp45 | 2031 |
| CESM1-CAM5     | rli1p1 | -             | -    | rcp26    | 2055 | rcp26    | 2047 | rcp26 | 2023 |
| CNRM-CM5       | rli1p1 | rcp85         | 2061 | rcp45    | 2059 | rcp45    | 2053 | rcp45 | 2035 |
| CSIRO-MK3-6-0  | r4i1p1 | rcp45         | 2073 | rcp45    | 2041 | rcp45    | 2039 | rcp45 | 2027 |
| EC-EARTH       | rli1p1 | rcp45         | 2096 | rcp45    | 2055 | rcp45    | 2049 | rcp45 | 2031 |
| GFDL-CM3       | rli1p1 | rcp85         | 2045 | rcp85    | 2030 | rcp85    | 2027 | rcp85 | 2016 |
| HADGEM2-CC     | rli1p1 | rcp45         | 2068 | rcp45    | 2041 | rcp45    | 2038 | rcp45 | 2024 |
| HADGEM2-ES     | rli1p1 | rcp45         | 2059 | rcp45    | 2037 | rcp45    | 2034 | rcp45 | 2020 |
| IPSL-CM5A-LR   | r3i1p1 | rcp45         | 2076 | rcp45    | 2041 | rcp45    | 2037 | rcp45 | 2024 |
| IPSL-CM5A-MR   | rli1p1 | rcp45         | 2072 | rcp45    | 2043 | rcp45    | 2038 | rcp45 | 2022 |
| MIROC-ESM-CHEM | rli1p1 | rcp45         | 2057 | rcp45    | 2036 | rcp45    | 2033 | rcp45 | 2021 |
| MIROC-ESM      | rli1p1 | rcp45         | 2062 | rcp45    | 2037 | rcp45    | 2034 | rcp45 | 2022 |
| MIROC5         | rli1p1 | rcp85         | 2062 | rcp45    | 2061 | rcp45    | 2056 | rcp45 | 2033 |
| MPI-ESM-LR     | rli1p1 | rcp85         | 2059 | rcp45    | 2059 | rcp45    | 2053 | rcp45 | 2030 |
| MPI-ESM-MR     | r2i1p1 | -             | -    | rcp45    | 2059 | rcp45    | 2054 | rcp45 | 2028 |
| MRI-CGCM3      | rli1p1 | rcp85         | 2062 | rcp45    | 2071 | rcp45    | 2066 | rcp45 | 2039 |
| NORESM1-M      | rli1p1 | rcp85         | 2064 | rcp45    | 2067 | rcp45    | 2061 | rcp45 | 2034 |

**Table A1.** Time slices for climate models from the CMIP5 model ensemble corresponding to the end of century warming level implied by different GMT trajectories analysed. For each model, the center year of a 21-year period is given.
